1 **COVID-19 Vaccination Uptake and Self-Reported Side Effects among Healthcare**  
2 **Workers in Mbale City Eastern Uganda**

3 **Authors:**

4 Gabriel Madut Akech<sup>1</sup>, Andrew Marvin Kanyike<sup>1</sup>, Ashah Galabuzi Nassozi<sup>1</sup>, Beatrice Aguti<sup>1</sup>,  
5 Ashley Winfred Nakawuki<sup>2</sup>, Denis Kimbugwe<sup>2</sup>, Josen Kiggundu<sup>3</sup>, Robert Maiteki<sup>2</sup>, Dorothy  
6 Mukyala<sup>2</sup>, Felix Bongomin<sup>4</sup>, Samuel Baker Obakiro<sup>5</sup>, Nekaka Rebecca<sup>6</sup>, Jacob Stanley  
7 Iramiot<sup>7</sup>

8 **Affiliations:**

- 9 1. Faculty of Health Sciences, Busitema University, Mbale, Uganda  
10 2. Mbale Regional Referral Hospital, Ministry of Health , Uganda  
11 3. Ministry of Health/AIDS Control Program, Kampala, Uganda  
12 4. Department of Medical Microbiology and Immunology, Faculty of Medicine, Gulu  
13 University, Gulu, Uganda  
14 5. Department of Pharmacology and Therapeutics, Faculty of Health Sciences, Busitema  
15 University, Mbale, Uganda  
16 6. Department of Public Health, Faculty of Health Sciences, Busitema University,  
17 Mbale, Uganda  
18 7. Department of Microbiology and Immunology, Faculty of Health Sciences, Busitema  
19 University, Mbale, Uganda  
20

21 **Corresponding Author**

22 Gabriel Madut Akech  
23 Faculty of health sciences, Busitema University, Mbale, Uganda  
24 Akechgabriel93@gmail.com

## 25 ABSTRACT

26 **Background:** Fear of anticipated side effects has hindered the COVID-19 vaccination  
27 program globally. We report the uptake and the self-reported side effects (SEs) of the  
28 COVID-19 vaccine among Healthcare workers (HCWs) in Mbale City Eastern Uganda.

29 **Methods:** A cross-sectional survey of HCWs at seven different level health facilities was  
30 conducted from 6<sup>th</sup> September to 7<sup>th</sup> October 2021 using a structured self-administered  
31 questionnaire.

32 **Results:** COVID-19 vaccine had been received by 119 (69%) participants of which 79 (66%)  
33 received the two recommended doses of the AstraZeneca vaccine. Getting vaccinated was  
34 associated with working in a lower health facility (aOR= 14.1, 95% CI: 4.9 – 39.6, P=0.000),  
35 perceived minor risk of contracting COVID-19 (aOR= 12.3, 95% CI: 1.0 – 44.6, p=0.047),  
36 and agreeing that COVID-19 vaccine is protective (aOR= 16.7, 95% CI: 5.6 – 50.4, p=0.000).  
37 97 (82%) of participants experienced side effects to at least one dose of which most were  
38 mild on both the first (n=362, 51%) and second dose (n=135, 69%). The most frequently  
39 reported side effects on the first and second dose were fever (79% and 20%), injection site  
40 pain (71% and 25%), and Fatigue (69% and 20%) respectively.

41 **Conclusions:** The majority of the HCWs in Mbale City had received at least one dose of the  
42 COVID-19 vaccine and experienced a side effect. The side effects were mostly mild on either  
43 dose thus the vaccines are generally safe.

44 **Keywords:** COVID-19 vaccine, associated factors, side effects, healthcare workers, Eastern  
45 Uganda.

## 46 INTRODUCTION

47 Coronavirus disease-2019 (COVID-19) is a viral pneumonia caused by the novel SARS-  
48 CoV-2 which was first reported in Wuhan, China in December 2019 and continues to pose a  
49 significant threat to public health globally (1). As of 26<sup>th</sup> November 2021, over 260 million  
50 cases and over 5.2 million deaths have been reported worldwide (Worldometer, 2021). In  
51 Uganda, the first case of COVID-19 was reported on 21<sup>st</sup> March 2020 (3), and as of 26<sup>th</sup>  
52 November 2021, over 126,965 cases and about 3,239 deaths reported (Ministry of Health  
53 Uganda, 2021).

54 At the moment, no single effective therapeutic agent has been approved for the treatment of  
55 COVID-19. However, several public health measures like social distancing, national-wide  
56 lockdowns, and hand-washing among others have been employed to control the pandemic(5).  
57 Despite these measures, COVID-19 remains a major public health challenge with some  
58 countries experiencing the third and fourth waves (5). Currently, vaccination against SARS

59 CoV-2 is thought to be the best public health measure to halt the COVID-19 pandemic (6).  
60 There are currently several COVID-19 vaccine candidates with at least 8 vaccines approved  
61 for use by the World Health Organization. These include Moderna (mRNA-1273),  
62 Pfizer/BioNtech (BNT162b2), Jansen (ad26.COV2.S), Oxford/AstraZeneca (AZD1222),  
63 Covishield (Oxford/AstraZeneca formulation), Covaxin (Bharat Biotech), Sinopharm (BBIP-  
64 CorV), and Sinovac (CoronaVac) (7,8).

65 This first roll out of COVID-19 vaccinations was considered a land mark for overcoming the  
66 pandemic (9,10). However vaccination has long been faced with hesitancy due to public  
67 worries about side effects (SEs) and efficacy (11), which is worse with COVID-19  
68 surrounded by conspiracies. The COVID-19 vaccines have however been reported by various  
69 clinical trials to be generally safe with limited side effects that are mild to moderate with a  
70 few severe reactions (12–15).

71 Healthcare workers (HCWs) are not only a high-risk group but also offer guidance on vaccine  
72 recommendations to the public which relies on them for this information (16,17). Automatic  
73 uptake of the COVID-19 vaccine by HCWs is not guaranteed as a study done in Israel,  
74 reported a high rate of COVID-19 vaccine skepticism among this group (18). Vaccination  
75 compliance relies on a personal risk–benefit perception, and broader political, religious,  
76 social, and historical factors (17).

77 Also, most data about side effects of the COVID-19 vaccines comes from manufacturer-  
78 funded studies in compliance with drug regulatory authorities which warrants continuous  
79 monitoring of adverse events (9,19). Ever since Uganda rolled out its vaccination program,  
80 no study has been published about the side effects of the vaccine among those that have  
81 received it. Therefore, we determined the uptake of the COVID-19 vaccine and self-reported  
82 side effects among healthcare workers in Mbale city, Eastern Uganda.

## 83 **Methods**

### 84 **Study Design**

85 This was a descriptive, cross-sectional study carried out from 6<sup>th</sup> September to 7<sup>th</sup> October  
86 2021 using a quantitative approach.

### 87 **Study Setting**

88 This study was carried out in seven health facilities in Mbale city, including six government  
89 facilities; Mbale regional referral hospital, Namatala Health centre IV, Malukhu Health  
90 Centre III, Namakwekwe Health Centre III, Busamaga Health Centre III, Mbale Municipal  
91 Health Centre II and The AIDS Support Organization (TASO) Mbale Centre of excellence a

92 private-not-for-profit facility. Uganda's health system has both public and private sector  
93 which has private-for-profit and private-not-for-profit facilities. The public health sector is  
94 divided into national (governed by the ministry of health) and district (governed by district  
95 health management team) based level facilities. The national level consists of national  
96 referral hospitals at the top then regional referral hospitals. The district level has the district  
97 hospitals at the helm followed by health centers IV,III, II and community extension health  
98 workers called Village health team (VHTs) serving as level I. Mbale city is located in the  
99 Eastern region of Uganda. Mbale Regional Referral Hospital is a tertiary hospital—serving  
100 the districts of Busia, Buddaka, Kibuku, Kapchorwa, Bukwa, Butaleja, Manafwa, Mbale,  
101 Pallisa, Sironko, budduda, Bukedea and Tororo(20). It's a 470-bed capacity hospital and  
102 serves as a teaching hospital for Busitema University Faculty of Health Sciences as well as an  
103 Internship center for graduates from medical schools for a one-year internship under the  
104 supervision of qualified specialists and Consultants.

### 105 **Study Population**

106 Healthcare workers in the selected facilities were involved in the study. A healthcare worker  
107 was considered as any person engaged in activities whose primary role is to improve the  
108 health of patients including nurses, midwives, intern doctors, medical officers, senior house  
109 officers, pharmacists, laboratory technicians and specialists in the field of medicine. Mbale  
110 Regional Referral Hospital (MRRH) had a total of 243 permanent HCWs and 57 interns on a  
111 temporary one-year contract. The other five lower health centers had a total of 120 trained  
112 health care workers of different cadres. TASO Mbale Centre of excellence had 31 full- time  
113 staff. This makes a total of about 451 health care workers in primary contact with patients  
114 within the selected health facilities in Mbale city currently.

### 115 **Inclusion and Exclusion Criteria**

116 HCWs at selected health facilities within Mbale city who consented to participate were  
117 included and those that didn't consent or were absent on duty were excluded.

### 118 **Sampling Procedure and Data collection**

119 The research followed a proportional stratified random sampling technique. The study  
120 population was stratified by level of health facility each taking a proportion depending on the  
121 percentage contribution to the total required sample size. Participants were enrolled by  
122 random sampling at that particular time data was collected at the facility. Data was collected  
123 using semi-structured questionnaire that was provided by research assistants at each facility.  
124 The research assistants were trained on the unique aspects of the study via a zoom session  
125 after they had been identified. Questionnaires were administered by hardcopy after informed  
126 consent had been given by the participant.

## 127 **Data Collection tool**

128 We used a modified questionnaire based on those that were used by other scholars. The  
129 questionnaire was semi-structured with 28 questions divided into five sections capturing  
130 socio-demographic information of participants, COVID-19 related experiences and attitudes  
131 towards COVID-19 vaccine, its uptake, and self-reported side effects among health workers  
132 that have taken the vaccine.

## 133 **Data Analysis**

134 Data from completed questionnaires were entered in Microsoft Excel 2016, cleaned, coded  
135 and analyzed using STATA 16. Descriptive statistics, and bivariate and multivariable logistic  
136 regression analyses were performed, and results were presented as tables, charts and figures.  
137 Chi-square or Fisher's exact test was used to assess associations between vaccine uptake and  
138 independent variables. An association with a p-value less than 0.05 was considered  
139 statistically significant.

## 140 **Results**

### 141 **Baseline characteristics of the participants**

142 One hundred seventy-two (172) participants were interviewed giving a 45% response rate.  
143 Most were female (n=95, 55%), married (n=90, 52%), with a median age of 31 (IQR: 25-39)  
144 years. Most participants were from Mbale Regional Referral Hospital (n=92, 53%). Forty-  
145 three (25%) participants were nursing officers and the minority were specialists (n=6, 3%),  
146 (Table 1).

147 **Table 1: Demographic characteristic of participants (N=172)**

| VARIABLE                        | Frequency         | Percentage |
|---------------------------------|-------------------|------------|
| <b>Age (Median; IQR), years</b> | <b>31 (25-39)</b> |            |
| 18-39                           | 130               | 76         |
| ≥40                             | 42                | 24         |
| <b>Sex</b>                      |                   |            |
| Female                          | 95                | 55         |
| Male                            | 77                | 45         |
| <b>Marital status</b>           |                   |            |
| Single                          | 76                | 44         |
| Married                         | 90                | 52         |
| Divorced/Separated              | 1                 | 1          |
| Widowed                         | 5                 | 3          |
| <b>Religion</b>                 |                   |            |
| Roman catholic                  | 46                | 27         |
| Anglican                        | 59                | 34         |
| Pentecostal                     | 42                | 24         |

|                                  |    |    |
|----------------------------------|----|----|
| Muslim                           | 24 | 14 |
| Others                           | 1  | 1  |
| <b>Cadre</b>                     |    |    |
| Medical officer                  | 15 | 9  |
| Nursing officer                  | 43 | 25 |
| Pharmacist                       | 3  | 2  |
| Midwife                          | 38 | 22 |
| Interns                          | 42 | 24 |
| Laboratory technician            | 15 | 9  |
| Specialists                      | 6  | 3  |
| Clinical Officers                | 8  | 5  |
| Counsellors                      | 2  | 1  |
| <b>Health Facility</b>           |    |    |
| Health center II                 | 13 | 8  |
| Health center III                | 41 | 24 |
| Health center IV                 | 20 | 12 |
| Mbale Regional Referral Hospital | 92 | 53 |
| Private Not for Profit           | 6  | 3  |

148

149 **COVID-19 vaccine uptake among healthcare workers**

150 The majority of the participants (n=119, 69%) had received at least one dose of the COVID-  
 151 19 vaccine. Of these, 79 (66%) had received two doses. The major reason for being  
 152 vaccinated was to protect oneself (n=95, 79%) and others (n=62, 52%) from COVID-19.  
 153 Among unvaccinated participants, the majority (n=21, 40%) were still hesitant and not sure  
 154 whether they majority will take it in future. The major reasons for not accepting to be  
 155 vaccinated against COVID-19 were uncertainty about the vaccine safety (n=31, 55%), and  
 156 negative information about the vaccine (n=30, 54%), (Table 2).

157 **Table 2: COVID-19 vaccine uptake and reasons for and against among participants**

| <b>Have you been vaccinated against COVID-19?</b>                    | <b>Frequency</b> | <b>Percentage</b> |
|----------------------------------------------------------------------|------------------|-------------------|
| Yes                                                                  | 119              | 69                |
| No                                                                   | 53               | 31                |
| <b>The number of COVID-19 vaccine doses received.</b>                |                  |                   |
| One Dose                                                             | 40               | 34                |
| Two Doses                                                            | 79               | 66                |
| <b>Are you intending to take the COVID-19 vaccine in the future?</b> |                  |                   |
| Yes, I will get vaccinated                                           | 18               | 34                |
| I am not sure                                                        | 21               | 40                |
| No, I will not get vaccinated                                        | 14               | 26                |
| <b>Reasons for COVID-19 vaccine uptake</b>                           |                  |                   |
| To protect me from getting COVID-19                                  | 95               | 79                |
| To protect others from getting COVID-19                              | 62               | 52                |
| I believe in vaccines and immunization                               | 48               | 40                |
| Government recommendations                                           | 64               | 53                |

|                                                                |    |    |
|----------------------------------------------------------------|----|----|
| Because my colleague had taken it                              | 7  | 6  |
| The vaccines are safe                                          | 42 | 35 |
| The vaccines are effective                                     | 36 | 30 |
| It is a social and moral responsibility                        | 25 | 21 |
| The vaccine was free of charge                                 | 38 | 32 |
| To be able to travel                                           | 31 | 26 |
| I am at high risk of severe disease                            | 30 | 25 |
| To get rid of the virus and end the pandemic                   | 25 | 21 |
| It's a job requirement                                         | 38 | 32 |
| It's my obligation as a healthcare worker to motivate others   | 61 | 51 |
| <b>Reasons for not getting the COVID-19 vaccine</b>            |    |    |
| I don't think it is needed                                     | 12 | 21 |
| I trust my immunity                                            | 18 | 32 |
| I don't know where to get the vaccination                      | 1  | 2  |
| I don't know where to get good/reliable information            | 4  | 7  |
| I have heard or read negative information on the vaccine.      | 30 | 54 |
| I don't think the vaccine is effective                         | 24 | 43 |
| I don't think the vaccine is safe/concerned about side effects | 31 | 55 |
| Someone else told me that the vaccine is not safe              | 9  | 16 |
| Had a bad experience with a previous vaccinator/health clinic  | 2  | 4  |
| Had a bad experience or reaction to previous vaccination       | 6  | 11 |
| Someone else told me they/their child had a bad reaction       | 12 | 21 |
| Fear of needles                                                | 2  | 4  |
| Religious reasons                                              | 4  | 7  |
| Other beliefs/traditional medicine                             | 3  | 5  |

158

159 **Factors associated with COVID-19 vaccine uptake among health workers**

160 At bivariable analysis, age ( $p=0.002$ ), marital status ( $p=0.019$ ), the cadre of the staff  
 161 ( $p<0.001$ ), level of health facility ( $p<0.001$ ), belief in the effectiveness of the COVID-19  
 162 vaccine ( $p<0.001$ ) and having a chronic illness ( $p=0.021$ ) were statistically significantly  
 163 associated with COVID-19 vaccine uptake, Table 3.

164 **Table 3: Uptake of COVID-19 vaccine and associated factors among the participants**

| VARIABLE                | COVID-19 VACCINE UPTAKE |                     | P-VALUE      |
|-------------------------|-------------------------|---------------------|--------------|
|                         | YES<br>Frequency (%)    | NO<br>Frequency (%) |              |
| <b>All participants</b> | 119 (69)                | 53 (31)             |              |
| <b>Age , years</b>      |                         |                     |              |
| 18-39                   | 82 (70)                 | 48 (91)             | <b>0.002</b> |
| ≥40                     | 37 (30)                 | 5 (9)               |              |
| <b>Sex</b>              |                         |                     |              |
| Female                  | 66 (55)                 | 29 (55)             | 0.928        |
| Male                    | 53 (45)                 | 24 (45)             |              |

| <b>Marital status</b>                                          |         |         |                  |
|----------------------------------------------------------------|---------|---------|------------------|
| Single                                                         | 45 (38) | 31 (58) | <b>0.019</b>     |
| Married                                                        | 68 (57) | 22 (42) |                  |
| Separated                                                      | 6 (5)   | 0 (0)   |                  |
| <b>Religion</b>                                                |         |         |                  |
| Roman Catholic                                                 | 36 (30) | 10 (19) | <b>0.454</b>     |
| Anglican                                                       | 40 (34) | 19 (36) |                  |
| Pentecostal                                                    | 27 (23) | 15 (28) |                  |
| Muslim                                                         | 15 (13) | 9 (17)  |                  |
| Others                                                         | 1 (1)   | 0 (0)   |                  |
| <b>Cadre</b>                                                   |         |         |                  |
| Medical officer                                                | 11 (9)  | 4 (8)   | <b>&lt;0.001</b> |
| Nursing officer                                                | 35 (29) | 8 (15)  |                  |
| Pharmacist                                                     | 2 (2)   | 1 (2)   |                  |
| Midwife                                                        | 30 (25) | 8 (15)  |                  |
| Interns                                                        | 15 (13) | 27 (51) |                  |
| Laboratory technician                                          | 13 (11) | 2 (4)   |                  |
| Specialists                                                    | 6 (5)   | 0 (0)   |                  |
| Clinical Officers                                              | 5 (4)   | 3 (6)   |                  |
| Counsellors                                                    | 2 (2)   | 0 (0)   |                  |
| <b>Health Facility</b>                                         |         |         |                  |
| Lower Health Facility                                          | 66 (55) | 8 (15)  | <b>&lt;0.001</b> |
| Hospital                                                       | 53 (45) | 45 (85) |                  |
| <b>Perceived likelihood of getting COVID-19 in the future?</b> |         |         |                  |
| Not at all                                                     | 27 (23) | 21 (40) | <b>0.072</b>     |
| Slightly                                                       | 48 (40) | 16 (30) |                  |
| Very likely                                                    | 44 (37) | 16 (30) |                  |
| <b>Overall worry about COVID-19?</b>                           |         |         |                  |
| Very worried                                                   | 49 (41) | 19 (36) | <b>0.332</b>     |
| Somewhat worried                                               | 52 (44) | 21 (40) |                  |
| Not at all worried                                             | 18 (15) | 13 (25) |                  |
| <b>Perceived COVID-19 personal risk.</b>                       |         |         |                  |
| Major risk                                                     | 71 (60) | 33 (62) | <b>0.072</b>     |
| Minor risk                                                     | 44 (37) | 14 (26) |                  |
| No risk at all                                                 | 4 (3)   | 6 (11)  |                  |
| <b>Have you been tested for COVID-19?</b>                      |         |         |                  |
| Tested positive                                                | 8 (7)   | 7 (13)  | <b>0.060</b>     |
| Tested negative                                                | 60 (50) | 17 (32) |                  |
| Haven't tested                                                 | 51 (43) | 29 (55) |                  |
| <b>Active involvement in COVID-19 management</b>               |         |         |                  |
| Yes                                                            | 66 (55) | 23 (43) | <b>0.144</b>     |
| No                                                             | 53 (45) | 30 (57) |                  |
| <b>COVID-19 vaccine gives effective protection</b>             |         |         |                  |
| Agree                                                          | 73 (61) | 11 (21) | <b>&lt;0.001</b> |
| Neutral                                                        | 15 (13) | 9 (17)  |                  |
| Disagree                                                       | 31 (26) | 33 (62) |                  |
| <b>Chronic illness</b>                                         |         |         |                  |
| Yes                                                            | 23 (19) | 3 (6)   | <b>0.021</b>     |
| No                                                             | 96 (81) | 50 (94) |                  |



166 At multivariable analysis, factors independently associated with uptake of the COVID-19  
 167 vaccine were as follows: working in a lower health facility (aOR= 14.1, 95% CI: 4.9 – 39.6,  
 168 P=0.000), individual perceived minor risk of contracting COVID-19 (aOR= 12.3, 95% CI:  
 169 1.0 – 44.6, p=0.047), and agreeing that COVID-19 vaccine is protective (aOR= 16.7, 95% CI:  
 170 5.6 – 50.4, p=0.000), (Table 4).

171 **Table 4: Multivariate logistic regression for factors associated with COVID-19 vaccine**  
 172 **uptake among participants.**

| VARIABLE                                                       | OR (95% CI)      | P-VALUE      | AOR (95% CI)      | P-VALUE      |
|----------------------------------------------------------------|------------------|--------------|-------------------|--------------|
| <b>Age</b>                                                     |                  |              |                   |              |
| 18-39                                                          | Ref              |              | Ref               |              |
| 40 years and above                                             | 4.3 (1.6 – 11.8) | <b>0.004</b> | 2.7 (0.7 – 10.2)  | 0.136        |
| <b>Marital Status</b>                                          |                  |              |                   |              |
| Single                                                         | 0.5 (0.2 – 0.9)  | <b>0.026</b> | 0.6 (0.2 – 1.6)   | 0.353        |
| Separated                                                      | Ref              |              | Ref               |              |
| <b>Cadre</b>                                                   |                  |              |                   |              |
| Medical officer                                                | 1.2 (0.2 – 6.9)  | 0.856        |                   |              |
| Nursing officer                                                | 1.9 (0.4 – 8.9)  | 0.428        |                   |              |
| Pharmacist                                                     | 0.9 (0.1 – 13.4) | 0.913        |                   |              |
| Midwife                                                        | 1.6 (0.3 – 7.7)  | 0.551        |                   |              |
| Interns                                                        | 0.2 (0.1 – 1.1)  | 0.059        |                   |              |
| Laboratory technician                                          | 2.8 (0.4 – 20.8) | 0.318        |                   |              |
| Specialists                                                    | Ref              |              |                   |              |
| <b>Health Facility</b>                                         |                  |              |                   |              |
| Lower Health Facility                                          | 7.0 (3.0 – 16.1) | <b>0.000</b> | 14.1 (4.9 – 39.6) | <b>0.000</b> |
| Hospital                                                       | Ref              |              | Ref               |              |
| <b>Perceived likelihood of getting COVID-19 in the future?</b> |                  |              |                   |              |
| Not at all                                                     | Ref              |              | Ref               |              |
| Slightly                                                       | 2.3 (1.0 – 5.2)  | <b>0.039</b> | 1.8 (0.5 – 5.8)   | 0.360        |
| Very likely                                                    | 2.1 (0.9 – 4.8)  | 0.065        | 1.3 (0.4 – 4.4)   | 0.677        |
| <b>Perceived COVID-19 personal risk.</b>                       |                  |              |                   |              |
| Major risk                                                     | 3.2 (0.9 – 12.2) | 0.084        | 8.2 (0.9 – 98.2)  | 0.097        |
| Minor risk                                                     | 4.7 (1.2 – 19.1) | <b>0.030</b> | 12.3 (1.0 – 44.6) | <b>0.047</b> |
| No risk at all                                                 | Ref              |              | Ref               |              |
| <b>Have you been tested for COVID-19?</b>                      |                  |              |                   |              |
| Tested positive                                                | 0.6 (0.2 – 1.9)  | 0.447        |                   |              |
| Tested negative                                                | 2.0 (0.9 – 4.1)  | 0.053        |                   |              |
| Haven't tested                                                 | Ref              |              |                   |              |
| <b>COVID-19 vaccine gives effective protection.</b>            |                  |              |                   |              |
| Agree                                                          | 7.1 (3.2 – 15.7) | <b>0.000</b> | 16.7 (5.6 – 50.4) | <b>0.000</b> |
| Disagree                                                       | 1.8 (0.7 – 4.6)  | 0.242        | 1.3 (0.3 – 4.9)   | 0.728        |
| Neutral                                                        | Ref              |              | Ref               |              |
| <b>Active involvement in COVID-19 management</b>               |                  |              |                   |              |
| Yes                                                            | 1.6 (0.8 – 3.1)  | 0.145        |                   |              |
| No                                                             | Ref              |              |                   |              |

| <b>Chronic illness</b> |                  |              |                  |       |
|------------------------|------------------|--------------|------------------|-------|
| Yes                    | 4.0 (1.1 – 13.9) | <b>0.030</b> | 3.1 (0.6 – 15.0) | 0.168 |
| No                     | Ref              |              | Ref              |       |

173

174 **Self-reported side-effects among covid-19 vaccine recipients**

175 The majority of the COVID-19 vaccine recipients (n=97, 82%) experienced side-effects of at  
 176 least one dose of the vaccine which lasted for a median duration of 3 (IQR: 3-7) days. All  
 177 recipients (n=97, 100%) experienced at least one side effect on their first dose of vaccination  
 178 and only thirty-eight (39%) on the second dose, Figure 2. Most of the side-effects were mild  
 179 on both the first (n=362, 51%) and second dose (n=135, 69%). Severe side-effects were  
 180 experienced more on the first (11%) than second (7%) dose (Figure 3).

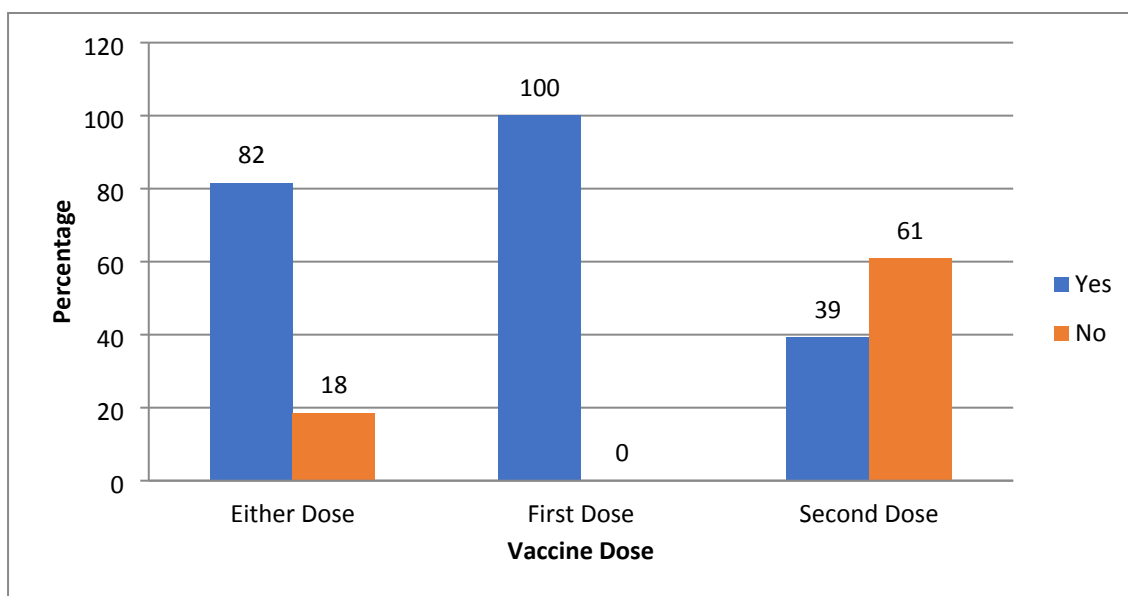

181

182 **Figure 2: Occurrence of self-reported side-effects on the different vaccine doses**

183

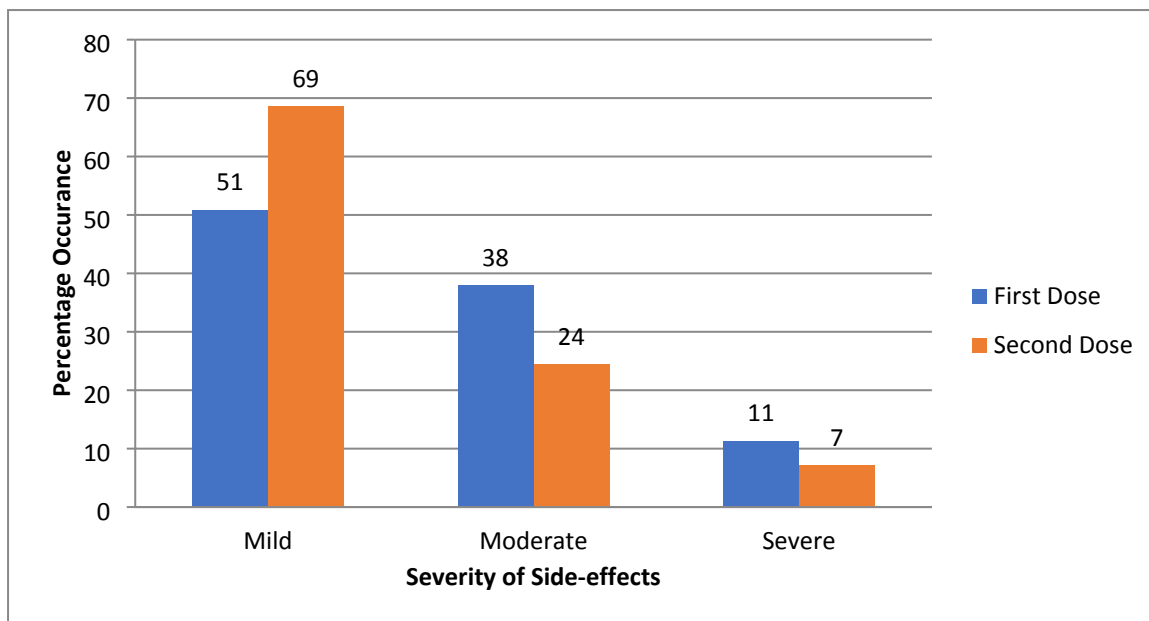

184  
185  
186

**Figure 3: Severity of self-reported side-effects on the different vaccine doses**

187 The most frequently reported side-effects of the first and second dose were fever (79%  
188 and 20%), injection site pain (71% and 25%) and Fatigue (69% and 20%) respectively, Figure  
189 4. Participants who had ever tested positive for COVID-19 experienced side effects for a  
190 longer duration (median= 7, IQR: 3-11 days) compared to those who had either tested  
191 negative (median= 5, IQR: 3—5 days) or had never tested (median= 3, IQR: 3-5 days). There  
192 was no statistically significant difference in the duration of side-effects among the different  
193 age groups (Figure 5).

194  
195  
196  
197  
198  
199  
200  
201  
202  
203

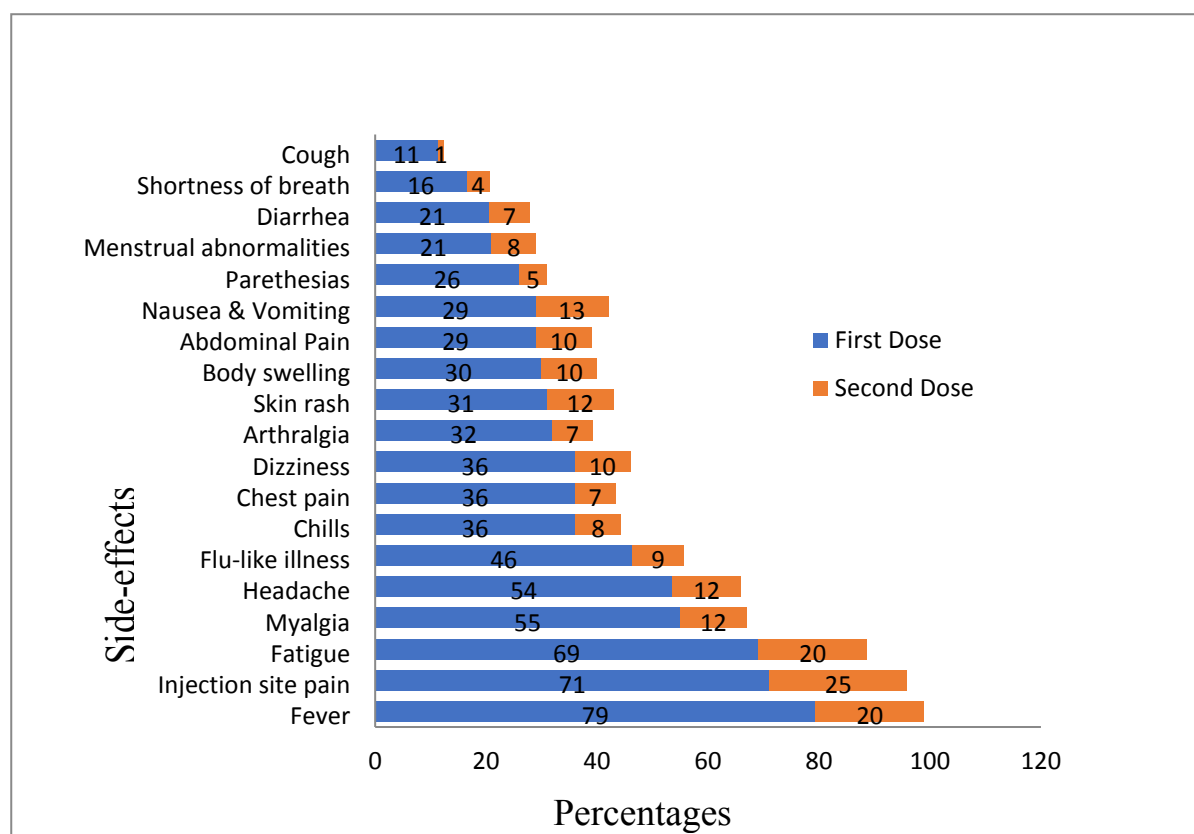

204

205

**Figure 4: The different self-reported side effects on both COVID-19 vaccine doses**

206

207

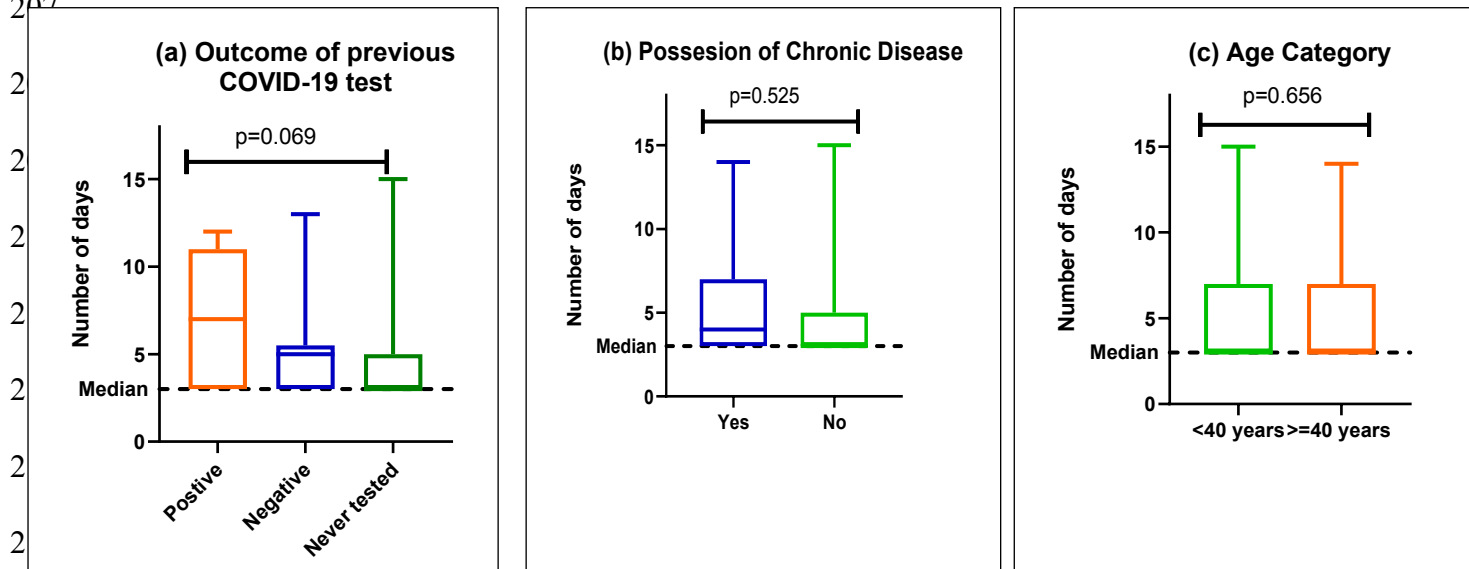

**Figure 5: Duration of self-reported side-effects compared among (a) outcomes of previous COVID-19 test (b) possession of chronic illness and (c) age category. Median duration of side-effects is 3 days**

## DISCUSSION

Health Care Workers (HCWs) being at the frontline in the fight against the pandemic are at a high risk of contracting COVID-19 as they provide medical services to COVID-19 patients. (21). As a result several HCWs have succumbed to COVID-19, with variable morbidity and mortality reported from different countries (22). In the COVID-19 vaccination programs of most countries in low- and middle-income countries (23). HCWs have been prioritized due to the limited supply of the COVID-19 vaccine. Despite this, COVID-19 vaccine hesitancy has been reported globally, including among HCWs and the WHO reports it among the top 10 global threats to health (18).

In this study, a high proportion (79%) of HCWs had received at least one dose of the COVID-19 vaccine. Our findings are similar to the 71.1% COVID-19 vaccine uptake reported in 19 countries among healthcare workers (24). However, in contrast, lower vaccine acceptability was reported in the U.S.A (36%) (16) and Turkey (31%) (25). Higher acceptability rates have been reported among HCWs in France (81.5%) (23), Mozambique (88.6%) (26) China (91.3%) (27), and Indonesia (95%) (28). It's reasonable that Asian countries like China which was hit hard by the pandemic reported higher uptake of the vaccine. The participants that believed that the vaccine was effective were twenty-eight times

234 more likely to get vaccinated. This finding is in line with another study where participants  
235 who believed that COVID-19 vaccination, is an effective way to prevent and control COVID-  
236 19 tended to accept COVID-19 vaccination as soon as possible (18). Furthermore, HCWs  
237 who perceived a major risk of contracting COVID-19 and had previously tested negative for  
238 COVID-19 took up the vaccine. Indeed in a multicenter study, Evridiki et al reported that  
239 increased risk perception towards COVID 19 was associated with the likely uptake of the  
240 COVID-19 vaccine (29). Working at a lower health facility had 25 -fold higher odds of  
241 uptake of the COVID-19 vaccine.

242 In this study, most of the side effects reported were mild (51%) in correspondence with the  
243 known side effects of the AstraZeneca vaccine (12–15). Most reported side effects included  
244 fever, injection site pain, and fatigue, and this is in line with a systematic review that reported  
245 the same adverse effects from various clinical trials (9,30). Participants reported more severe  
246 side effects with the first than the second dose in contrast to Mathioudakis et al who noted  
247 more side effects with the second dose (10). After the first vaccine dose, the body gets  
248 sensitized to the antigens and a severe immune reaction is expected on the booster dose.  
249 Probably most of the vaccine recipients could have been infected at the time of vaccination  
250 with sensitized immune systems that reacted severely to re-exposure of the virus since prior  
251 testing to vaccination wasn't done. To further reinforce that, participants who had ever  
252 tested positive for COVID-19 experienced a longer duration of symptoms compared to those  
253 who tested negative.

### 254 **Limitations and Strengths**

255 The study provides results from multiple health facilities, and information about the relatively  
256 real-world safety profiles of the AstraZeneca vaccine in Uganda. However, this study has  
257 some limitations; the sample size is relatively small and was conducted mainly in an urban  
258 setting in a single city thus the findings may not be confidently generalizable to the rest of the  
259 country. Future studies involving a larger sample size are recommended to provide a  
260 complete side-effects profile of COVID-19 vaccines among recipients in Uganda.

### 261 **Conclusion**

262 In conclusion, our findings have shown high levels of uptake of the COVID-19 vaccine  
263 among HCWs in Mbale city. At least four-fifth of HCWs experienced at least one SE after  
264 receiving the COVID-19 vaccine. Most of the side effects were mild and the same as those  
265 seen in other commonly provided vaccines therefore the vaccines are generally safe and can  
266 be taken by the public with confidence.

### 267 **Funding**

268 This study was funded by the Fogarty International Center of the National Institutes of  
269 Health, U.S. Department of State's Office of the U.S. Global AIDS Coordinator and Health  
270 Diplomacy (S/GAC), and President's Emergency Plan for AIDS Relief (PEPFAR) under  
271 Award Number IR25TW011213.

### 272 **Declaration of competing interest**

273 The authors declare that they have no known competing financial interests or personal  
274 relationships that could have appeared to influence the work reported in this paper. The  
275 content is solely the responsibility of the authors and does not necessarily represent the  
276 official views of the National Institutes of Health

### 277 **Consent for publication**

278 Not applicable

### 279 **Ethical Consideration**

280 The proposal was submitted for ethical review and approved by the Research Ethics  
281 Committee of Cure Children's Hospital Uganda (CCHU-REC) under approval number  
282 CCHU-REC/02/2021. Additional permission was requested from the administration of the  
283 health facilities where the study was carried out and all participants provided an informed  
284 consent. The ethical principles of involvement of human research subjects as outlined in the  
285 *Nuremberg Code* and the *Declaration of Helsinki* were strictly adhered to.

### 286 **Authors' contributions**

287 This study was carried out with considerable contributions from all authors. Author FB,  
288 AMK, AGN, BA, AWN, GMA, RM, JSI and SBO, conceptualized and design the study  
289 protocol. Author AMK, GMA, AGN, BA, AWN, DK, JK, RM, and DM, participated in data  
290 collection. AMK, FB, GMA and JSI analyzed the data. Author GMA and AMK drafted the  
291 first manuscript, NK and JSI conducted critical reviews. All authors reviewed and approved  
292 the final manuscript.

### 293 **Authors' Details**

294 <sup>1</sup>Faculty of Health Sciences, Busitema University, Mbale, Uganda, <sup>2</sup>Mbale Regional Referral  
295 Hospital, Ministry of Health , Uganda, <sup>3</sup>Ministry of Health/AIDS Control Program, Kampala,  
296 Uganda, <sup>4</sup>Department of Medical Microbiology and Immunology, Faculty of Medicine, Gulu  
297 University, Gulu, Uganda, <sup>5</sup>Department of Pharmacology and Therapeutics, Faculty of Health  
298 Sciences, Busitema University, Mbale, Uganda, <sup>6</sup>Department of Public Health, Faculty of  
299 Health Sciences, Busitema University, Mbale, Uganda, <sup>7</sup>Department of Microbiology and  
300 Immunology, Faculty of Health Sciences, Busitema University, Mbale, Uganda

301

## 302 REFERENCES

- 303 1. Al-mohaithef M, Padhi BK. Determinants of COVID-19 Vaccine Acceptance in Saudi  
304 Arabia : A Web-Based National Survey. 2020;1657–63.
- 305 2. Worldometer. COVID-19 Virus Pandemic Updates.
- 306 3. Ajari EE, Kanyike AM, Ojilong D, Abdulbasit IO. COVID-19 in Uganda:  
307 Epidemiology and Response. *Eur J Med Educ Technol*. 2020;13(2):em2009.
- 308 4. Ministry of Health Uganda. MOH COVID-19 Information Portal. 2020.
- 309 5. Looi MK. Covid-19: Is a second wave hitting Europe? *BMJ*. 2020;371:4113.
- 310 6. Gao Q, Bao L, Mao H, Wang L, Xu K, Yang M, et al. Development of an inactivated  
311 vaccine candidate for SARS-CoV-2. 2020;81(July):77–81.
- 312 7. Hiller N, Goldberg SN, Cohen-Cymbarknoh M, Vainstein V, Simanovsky N.  
313 Lymphadenopathy Associated With the COVID-19 Vaccine. *Cureus*. 2021 Feb;13(2).
- 314 8. Kadali RAK, Janagama R, Peruru S, Gajula V, Madathala RR, Chennaiahgari N, et al.  
315 Adverse effects of COVID-19 mRNA-1273 vaccine: A randomized, cross-sectional  
316 study on healthcare workers with detailed self-reported symptoms. *J Med Virol*. 2021  
317 Apr;jmv.26996.
- 318 9. Riad A, Pokorná A, Attia S, Klugarová J, Koščík M, Klugar M. Prevalence of COVID-  
319 19 Vaccine Side Effects among Healthcare Workers in the Czech Republic. *J Clin*  
320 *Med*. 2021 Apr;10(7):1428.
- 321 10. Mathioudakis AG, Ghrew M, Ustianowski A, Ahmad S, Borrow R, Papavasileiou LP,  
322 et al. Self-Reported Real-World Safety and Reactogenicity of COVID-19 Vaccines : A  
323 Vaccine Recipient Survey. 2021;1–13.
- 324 11. Sallam M, Dababseh D, Eid H, Al-Mahzoum K, Al-Haidar A, Taim D, et al. High  
325 Rates of COVID-19 Vaccine Hesitancy and Its Association with Conspiracy Beliefs: A  
326 Study in Jordan and Kuwait among Other Arab Countries. *Vaccines*. 2021 Jan;9(1):42.
- 327 12. Polack FP, Thomas SJ, Kitchin N, Absalon J, Gurtman A, Lockhart S, et al. Safety and  
328 Efficacy of the BNT162b2 mRNA Covid-19 Vaccine. *N Engl J Med*. 2020  
329 Dec;383(27):2603–15.
- 330 13. Folegatti PM, Ewer KJ, Aley PK, Angus B, Becker S, Belij-Rammerstorfer S, et al.  
331 Safety and immunogenicity of the ChAdOx1 nCoV-19 vaccine against SARS-CoV-2:

- 332 a preliminary report of a phase 1/2, single-blind, randomised controlled trial. *Lancet*.  
333 2020 Aug;396(10249):467–78.
- 334 14. Zhu F-C, Guan X-H, Li Y-H, Huang J-Y, Jiang T, Hou L-H, et al. Immunogenicity  
335 and safety of a recombinant adenovirus type-5-vectored COVID-19 vaccine in healthy  
336 adults aged 18 years or older: a randomised, double-blind, placebo-controlled, phase 2  
337 trial. *Lancet*. 2020 Aug;396(10249):479–88.
- 338 15. Logunov DY, Dolzhikova I V., Shcheblyakov D V., Tukhvatulin AI, Zubkova O V.,  
339 Dzharullaeva AS, et al. Safety and efficacy of an rAd26 and rAd5 vector-based  
340 heterologous prime-boost COVID-19 vaccine: an interim analysis of a randomised  
341 controlled phase 3 trial in Russia. *Lancet*. 2021 Feb;397(10275):671–81.
- 342 16. Rahul S, Abu BS, Shubhra U, Mriganka S, Saket K, Hamza M, et al. COVID-19  
343 Vaccine Acceptance Among Health Care Workers in the United States. 2021;
- 344 17. Nzaji MK, Ngombe LK, Mwamba GN, Miema JM, Lungoyo CL, Mwimba BL.  
345 Acceptability of Vaccination Against COVID-19 Among Healthcare Workers in the  
346 Democratic Republic of the Congo. 2020;103–9.
- 347 18. Dror AA, Eisenbach N, Taiber S, Morozov NG, Mizrahi M, Zigron A. Vaccine  
348 hesitancy : the next challenge in the fight against COVID - 19. *Eur J Epidemiol*  
349 [Internet]. 2020;35(8):775–9. Available from: [https://doi.org/10.1007/s10654-020-](https://doi.org/10.1007/s10654-020-00671-y)  
350 00671-y
- 351 19. Chapin-Bardales J, Gee J, Myers T. Reactogenicity Following Receipt of mRNA-  
352 Based COVID-19 Vaccines. *JAMA*. 2021 Apr;383(27):2603–15.
- 353 20. Akech GM, Naloli M, Sebwami P, Kazibwe P, Atwikiriize M, Onyait J, et al.  
354 Pneumococcal carriage and antibiotic susceptibility patterns in mother-baby pairs in a  
355 rural community in Eastern Uganda : a cross-sectional study [ version 1 ; peer review :  
356 awaiting peer review ]. 2020;1–8.
- 357 21. Alhassan RK, Agyei SO, Ansah EK, Gyapong M. COVID - 19 vaccine uptake among  
358 health care workers in Ghana : a case for targeted vaccine deployment campaigns in  
359 the global south. *Hum Resour Health*. 2021;1–12.
- 360 22. Erdem H, Lucey DR. Healthcare worker infections and deaths due to COVID-19 : A  
361 survey from 37 nations and a call for WHO to post national data on their website. *Int J*  
362 *Infect Dis*. 2020;(January).



- 363 23. Gagneux-brunon A, Detoc M, Bruel S, Tardy B, Rozaire O. Intention to get  
364 vaccinations against COVID-19 in French healthcare workers during the first  
365 pandemic wave : a cross-sectional survey. *J Hosp Infect.* 2021;108:168–73.
- 366 24. Lazarus J V, Ratzan SC, Palayew A, Gostin LO, Larson HJ, Rabin K, et al. A global  
367 survey of potential acceptance of a COVID-19 vaccine. *Nat Med [Internet].* 2020;  
368 Available from: <http://dx.doi.org/10.1038/s41591-020-1124-9>
- 369 25. Salali GD. COVID-19 vaccine hesitancy is associated with beliefs on the origin of the  
370 novel coronavirus in the UK and Turkey. 2020;(i):26–8.
- 371 26. Dula J, Mulhanga A, Nhanombe A, Cumbi L, Júnior A, Gwatsvaira J, et al. Covid-19  
372 vaccine acceptability and its determinants in mozambique: An online survey.  
373 *Vaccines.* 2021;9(8):1–10.
- 374 27. Wang J, Jing R, Lai X, Zhang H, Lyu Y, Knoll MD, et al. Acceptance of COVID-19  
375 Vaccination during the COVID-19 Pandemic in China. :1–14.
- 376 28. Harapan H, Wagner AL, Yufika A, Winardi W, Anwar S, Gan AK, et al. Acceptance  
377 of a COVID-19 Vaccine in Southeast Asia: A Cross-Sectional Study in Indonesia.  
378 *Front Public Heal.* 2020;8(July):1–8.
- 379 29. Evridiki P, Petros G, Enkeleint AM, Agathi A, Alexandros A, Evanthia A, et al.  
380 Factors influencing nursing students’ intention to accept COVID-19 vaccination – A  
381 pooled analysis of seven countries. *medRxiv Prepr Serv Heal Sci.* 2021;
- 382 30. Kaur RJ, Dutta S, Bhardwaj P, Charan J, Dhingra S, Mitra P, et al. Adverse Events  
383 Reported From COVID-19 Vaccine Trials: A Systematic Review. *Indian J Clin*  
384 *Biochem.* 2021 Mar;
- 385

Table 1: Demographic characteristic of participants (N=172)

| VARIABLE                        | Frequency         | Percentage |
|---------------------------------|-------------------|------------|
| <b>Age (Median; IQR), years</b> | <b>31 (25-39)</b> |            |
| 18-39                           | 130               | 76         |
| ≥40                             | 42                | 24         |
| <b>Sex</b>                      |                   |            |
| Female                          | 95                | 55         |
| Male                            | 77                | 45         |
| <b>Marital status</b>           |                   |            |
| Single                          | 76                | 44         |
| Married                         | 90                | 52         |
| Divorced/Separated              | 1                 | 1          |
| Widowed                         | 5                 | 3          |
| <b>Religion</b>                 |                   |            |
| Roman catholic                  | 46                | 27         |
| Anglican                        | 59                | 34         |
| Pentecostal                     | 42                | 24         |
| Muslim                          | 24                | 14         |
| Others                          | 1                 | 1          |
| <b>Cadre</b>                    |                   |            |
| Medical officer                 | 15                | 9          |
| Nursing officer                 | 43                | 25         |
| Pharmacist                      | 3                 | 2          |
| Midwife                         | 38                | 22         |
| Interns                         | 42                | 24         |
| Laboratory technician           | 15                | 9          |
| Specialists                     | 6                 | 3          |
| Clinical Officers               | 8                 | 5          |
| Counsellors                     | 2                 | 1          |
| <b>Health Facility</b>          |                   |            |
| Health center II                | 13                | 8          |
| Health center III               | 41                | 24         |
| Health center IV                | 20                | 12         |
| Mbale Regional Referral         | 92                | 53         |

medRxiv preprint doi: <https://doi.org/10.1101/2022.07.11.22277490>; this version posted July 12, 2022. The copyright holder for this preprint (which was not certified by peer review) is the author/funder, who has granted medRxiv a license to display the preprint in perpetuity. It is made available under a [CC-BY 4.0 International license](https://creativecommons.org/licenses/by/4.0/).

|                        |   |   |
|------------------------|---|---|
| Hospital               |   |   |
| Private Not for Profit | 6 | 3 |

Table 2: COVID-19 vaccine uptake and reasons for and against among participants

| Have you been vaccinated against COVID-19?                   | Frequency | Percentage |
|--------------------------------------------------------------|-----------|------------|
| Yes                                                          | 119       | 69         |
| No                                                           | 53        | 31         |
| <b>Number of COVID-19 vaccine doses received.</b>            |           |            |
| One Dose                                                     | 40        | 34         |
| Two Doses                                                    | 79        | 66         |
| <b>Are you intending to take COVID-19 vaccine in future?</b> |           |            |
| Yes, I will get vaccinated                                   | 18        | 34         |
| I am not sure                                                | 21        | 40         |
| No, I will not get vaccinated                                | 14        | 26         |
| <b>Reasons for COVID-19 vaccine uptake</b>                   |           |            |
| To protect myself from getting COVID-19                      | 95        | 79         |
| To protect others from getting COVID-19                      | 62        | 52         |
| I believe in vaccines and immunization                       | 48        | 40         |
| Government recommendations                                   | 64        | 53         |
| Because my colleague had taken it                            | 7         | 6          |
| The vaccines are safe                                        | 42        | 35         |
| The vaccines are effective                                   | 36        | 30         |
| It is a social and moral responsibility                      | 25        | 21         |
| The vaccine was free of charge                               | 38        | 32         |
| To be able to travel                                         | 31        | 26         |
| I am at high risk of severe disease                          | 30        | 25         |
| To get rid of the virus and end the pandemic                 | 25        | 21         |
| It's a job requirement                                       | 38        | 32         |
| It's my obligation as a healthcare worker to motivate others | 61        | 51         |

medRxiv preprint doi: <https://doi.org/10.1101/2022.07.11.22277490>; this version posted July 12, 2022. The copyright holder for this preprint (which was not certified by peer review) is the author/funder, who has granted medRxiv a license to display the preprint in perpetuity. It is made available under a [CC-BY 4.0 International license](https://creativecommons.org/licenses/by/4.0/).

| <b>Reasons for not getting COVID-19 vaccine</b>                |    |    |
|----------------------------------------------------------------|----|----|
| I don't think it is needed                                     | 12 | 21 |
| I trust my immunity                                            | 18 | 32 |
| I don't know where to get vaccination                          | 1  | 2  |
| I don't know where to get good/reliable information            | 4  | 7  |
| I have heard or read negative information on the vaccine.      | 30 | 54 |
| I don't think the vaccine is effective                         | 24 | 43 |
| I don't think the vaccine is safe/concerned about side effects | 31 | 55 |
| Someone else told me that the vaccine is not safe              | 9  | 16 |
| Had a bad experience with previous vaccinator/health clinic    | 2  | 4  |
| Had a bad experience or reaction with previous vaccination     | 6  | 11 |
| Someone else told me they/their child had a bad reaction       | 12 | 21 |
| Fear of needles                                                | 2  | 4  |
| Religious reasons                                              | 4  | 7  |
| Other beliefs/traditional medicine                             | 3  | 5  |

medRxiv preprint doi: <https://doi.org/10.1101/2022.07.16.22273490>; this version posted July 12, 2022. The copyright holder for this preprint (which was not certified by peer review) is the author/funder, who has granted medRxiv a license to display the preprint in perpetuity. It is made available under a [CC-BY 4.0 International license](https://creativecommons.org/licenses/by/4.0/).

Table 3: Uptake of COVID-19 vaccine and associated factors among the participants

| <b>VARIABLE</b>         | <b>COVID-19 VACCINE UPTAKE</b> |                             | <b>P-VALUE</b> |
|-------------------------|--------------------------------|-----------------------------|----------------|
|                         | <b>YES<br/>Frequency (%)</b>   | <b>NO<br/>Frequency (%)</b> |                |
| <b>All participants</b> | 119 (69)                       | 53 (31)                     |                |
| <b>Age , years</b>      |                                |                             |                |
| 18-39                   | 82 (70)                        | 48 (91)                     | 0.002          |
| ≥40                     | 37 (30)                        | 5 (9)                       |                |
| <b>Sex</b>              |                                |                             |                |
| Female                  | 66 (55)                        | 29 (55)                     | 0.928          |
| Male                    | 53 (45)                        | 24 (45)                     |                |
| <b>Marital status</b>   |                                |                             |                |
| Single                  | 45 (38)                        | 31 (58)                     | 0.019          |
| Married                 | 68 (57)                        | 22 (42)                     |                |
| Separated               | 6 (5)                          | 0 (0)                       |                |

| <b>Religion</b>                                            |         |         |        |
|------------------------------------------------------------|---------|---------|--------|
| Roman Catholic                                             | 36 (30) | 10 (19) | 0.454  |
| Anglican                                                   | 40 (34) | 19 (36) |        |
| Pentecostal                                                | 27 (23) | 15 (28) |        |
| Muslim                                                     | 15 (13) | 9 (17)  |        |
| Others                                                     | 1 (1)   | 0 (0)   |        |
| <b>Cadre</b>                                               |         |         |        |
| Medical officer                                            | 11 (9)  | 4 (8)   | <0.001 |
| Nursing officer                                            | 35 (29) | 8 (15)  |        |
| Pharmacist                                                 | 2 (2)   | 1 (2)   |        |
| Midwife                                                    | 30 (25) | 8 (15)  |        |
| Interns                                                    | 15 (13) | 27 (51) |        |
| Laboratory technician                                      | 13 (11) | 2 (4)   |        |
| Specialists                                                | 6 (5)   | 0 (0)   |        |
| Clinical Officers                                          | 5 (4)   | 3 (6)   |        |
| Counsellors                                                | 2 (2)   | 0 (0)   |        |
| <b>Health Facility</b>                                     |         |         |        |
| Lower Health Facility                                      | 66 (55) | 8 (15)  | <0.001 |
| Hospital                                                   | 53 (45) | 45 (85) |        |
| <b>Perceived likelihood of getting COVID-19 in future?</b> |         |         |        |
| Not at all                                                 | 27 (23) | 21 (40) | 0.072  |
| Slightly                                                   | 48 (40) | 16 (30) |        |
| Very likely                                                | 44 (37) | 16 (30) |        |
| <b>Overall worry about COVID-19?</b>                       |         |         |        |
| Very worried                                               | 49 (41) | 19 (36) | 0.332  |
| Somewhat worried                                           | 52 (44) | 21 (40) |        |
| Not at all worried                                         | 18 (15) | 13 (25) |        |
| <b>Perceived COVID-19 personal risk.</b>                   |         |         |        |
| Major risk                                                 | 71 (60) | 33 (62) | 0.072  |
| Minor risk                                                 | 44 (37) | 14 (26) |        |
| No risk at all                                             | 4 (3)   | 6 (11)  |        |
| <b>Have you been tested for COVID-19?</b>                  |         |         |        |
| Tested positive                                            | 8 (7)   | 7 (13)  | 0.060  |
| Tested negative                                            | 60 (50) | 17 (32) |        |

medRxiv preprint doi: <https://doi.org/10.1101/2022.07.11.22277490>; this version posted July 12, 2022. The copyright holder for this preprint (which was not certified by peer review) is the author/funder, who has granted medRxiv a license to display the preprint in perpetuity. It is made available under a [CC-BY 4.0 International license](https://creativecommons.org/licenses/by/4.0/).

|                                                    |         |         |        |
|----------------------------------------------------|---------|---------|--------|
| Haven't tested                                     | 51 (43) | 29 (55) |        |
| <b>Active involvement in COVID-19 management</b>   |         |         |        |
| Yes                                                | 66 (55) | 23 (43) | 0.144  |
| No                                                 | 53 (45) | 30 (57) |        |
| <b>COVID-19 vaccine gives effective protection</b> |         |         |        |
| Agree                                              | 73 (61) | 11 (21) | <0.001 |
| Neutral                                            | 15 (13) | 9 (17)  |        |
| Disagree                                           | 31 (26) | 33 (62) |        |
| <b>Chronic illness</b>                             |         |         |        |
| Yes                                                | 23 (19) | 3 (6)   | 0.021  |
| No                                                 | 96 (81) | 50 (94) |        |

medRxiv preprint doi: <https://doi.org/10.1101/2022.07.11.22277490>; this version posted July 12, 2022. The copyright holder for this preprint (which was not certified by peer review) is the author/funder, who has granted medRxiv a license to display the preprint in perpetuity. It is made available under a [CC-BY 4.0 International license](https://creativecommons.org/licenses/by/4.0/).

Table 4: Multivariate logistic regression for factors associated with COVID-19 vaccine uptake among participants.

| VARIABLE              | AOR (95% CI)     | P-VALUE |
|-----------------------|------------------|---------|
| <b>Age</b>            |                  |         |
| 18-39                 | 1                | 0.195   |
| 40 years and above    | 2.7 (0.5-12.3)   |         |
| <b>Marital Status</b> |                  |         |
| Single                | 0.5 (0.1-1.7)    | 0.301   |
| Separated             | 1                |         |
| <b>Religion</b>       |                  |         |
| Muslim                | 1                | 0.104   |
| Roman Catholic        | 5.6 (0.6-45.8)   |         |
| Anglican              | 0.6 (0.1-4.5)    |         |
| Pentecostal           | 1.2 (0.1-9.8)    |         |
| <b>Cadre</b>          |                  |         |
| Medical officer       | 2.7 (1.1-65.2)   | 0.534   |
| Nursing officer       | 5.9 (0.2-124.6)  | 0.253   |
| Pharmacist            | 185.8 (0.4-76.7) | 0.089   |
| Midwife               | 3.6 (0.1-80.1)   | 0.408   |
| Interns               | 0.9 (0.0-17.0)   | 0.984   |

|                                                            |                  |        |
|------------------------------------------------------------|------------------|--------|
| Laboratory technician                                      | 4.5 (0.1-147.3)  | 0.395  |
| Specialists                                                | 1                |        |
| <b>Health Facility</b>                                     |                  |        |
| Lower Health Facility                                      | 25.9 (5.9-112.7) | <0.001 |
| Hospital                                                   | 1                |        |
| <b>Perceived likelihood of getting COVID-19 in future?</b> |                  |        |
| Not at all                                                 | 0.6 (0.1-3.1)    | 0.577  |
| Slightly                                                   | 0.9 (0.2-3.6)    | 0.948  |
| Very likely                                                | 1                |        |
| <b>Perceived COVID-19 personal risk.</b>                   |                  |        |
| Major risk                                                 | 14.3 (1.1-181.2) | 0.039  |
| Minor risk                                                 | 25.1 (2.1-290.7) | 0.010  |
| No risk at all                                             | 1                |        |
| <b>Have you been tested for COVID-19?</b>                  |                  |        |
| Tested positive                                            | 1.4 (0.1-14.5)   | 0.731  |
| Tested negative                                            | 3.3 (1.0-10.7)   | 0.046  |
| Haven't tested                                             | 1                |        |
| <b>COVID-19 vaccine gives effective protection.</b>        |                  |        |
| Agree                                                      | 28.3 (6.3-126.1) | <0.001 |
| Neutral                                                    | 1.5 (0.2-8.7)    | 0.635  |
| Disagree                                                   | 1                |        |
| <b>Active involvement in COVID-19 management</b>           |                  |        |
| Yes                                                        | 2.2 (0.6-7.7)    | 0.193  |
| No                                                         | 1                |        |
| <b>Chronic illness</b>                                     |                  |        |
| Yes                                                        | 8.2 (0.8-80.6)   | 0.070  |
| No                                                         | 1                |        |

medRxiv preprint doi: <https://doi.org/10.1101/2022.07.11.22277490>; this version posted July 12, 2022. The copyright holder for this preprint (which was not certified by peer review) is the author/funder, who has granted medRxiv a license to display the preprint in perpetuity. It is made available under a CC-BY 4.0 International license.

## Source of negative information about COVID-19 vaccination

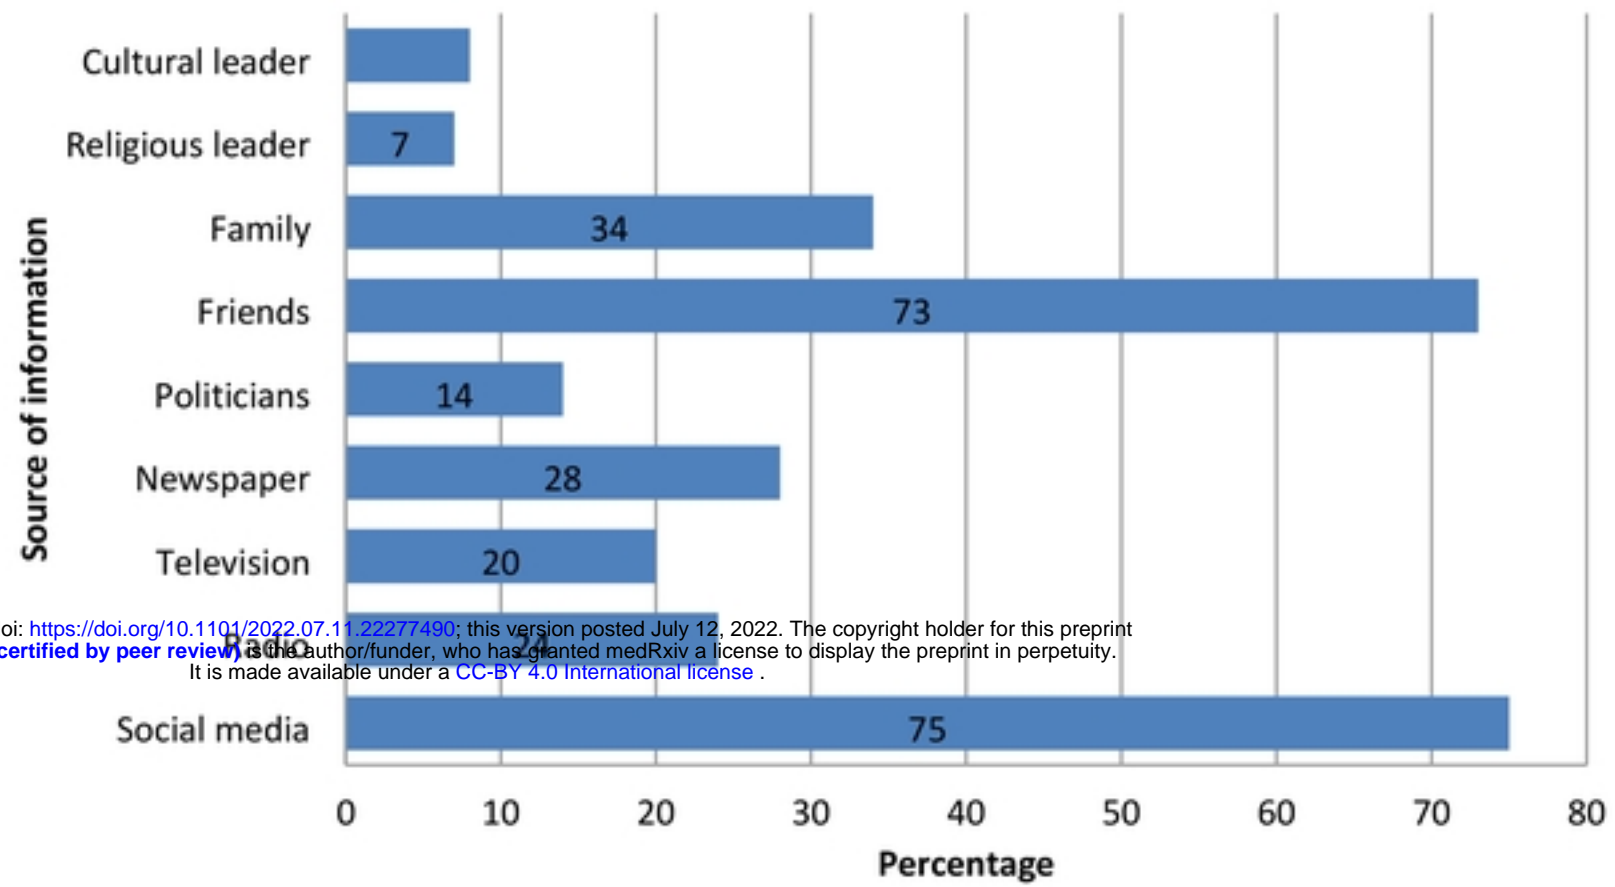

medRxiv preprint doi: <https://doi.org/10.1101/2022.07.11.22277490>; this version posted July 12, 2022. The copyright holder for this preprint (which was not certified by peer review) is the author/funder, who has granted medRxiv a license to display the preprint in perpetuity. It is made available under a [CC-BY 4.0 International license](https://creativecommons.org/licenses/by/4.0/).

Figure 1: Sources of negative information about COVID-19 vaccination among participants

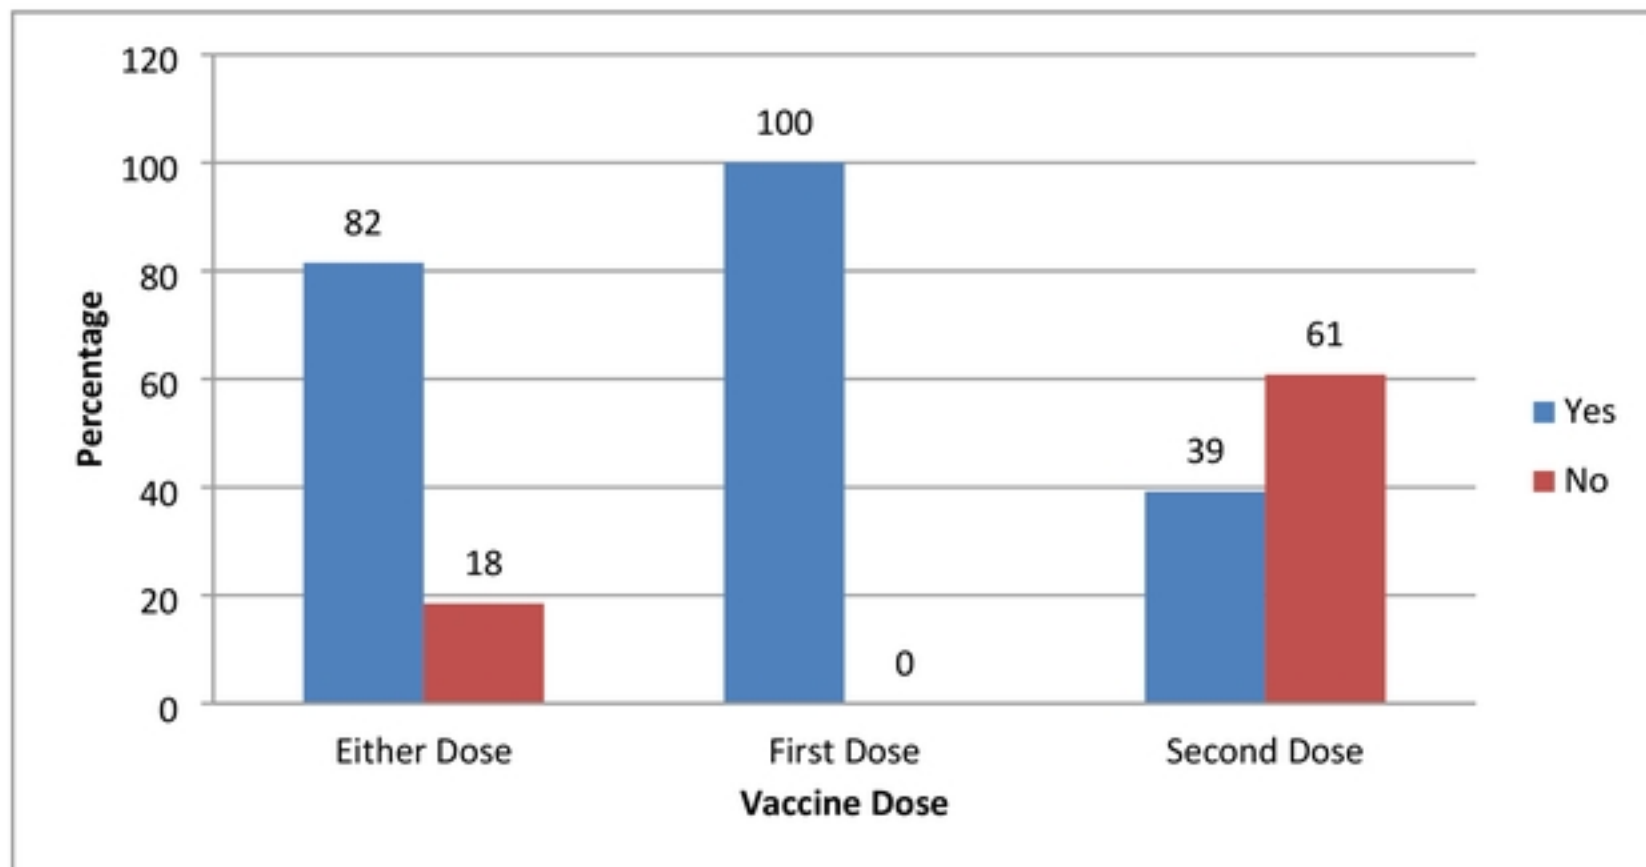

Figure 2: Occurrence of self-reported side-effects on the different vaccine doses



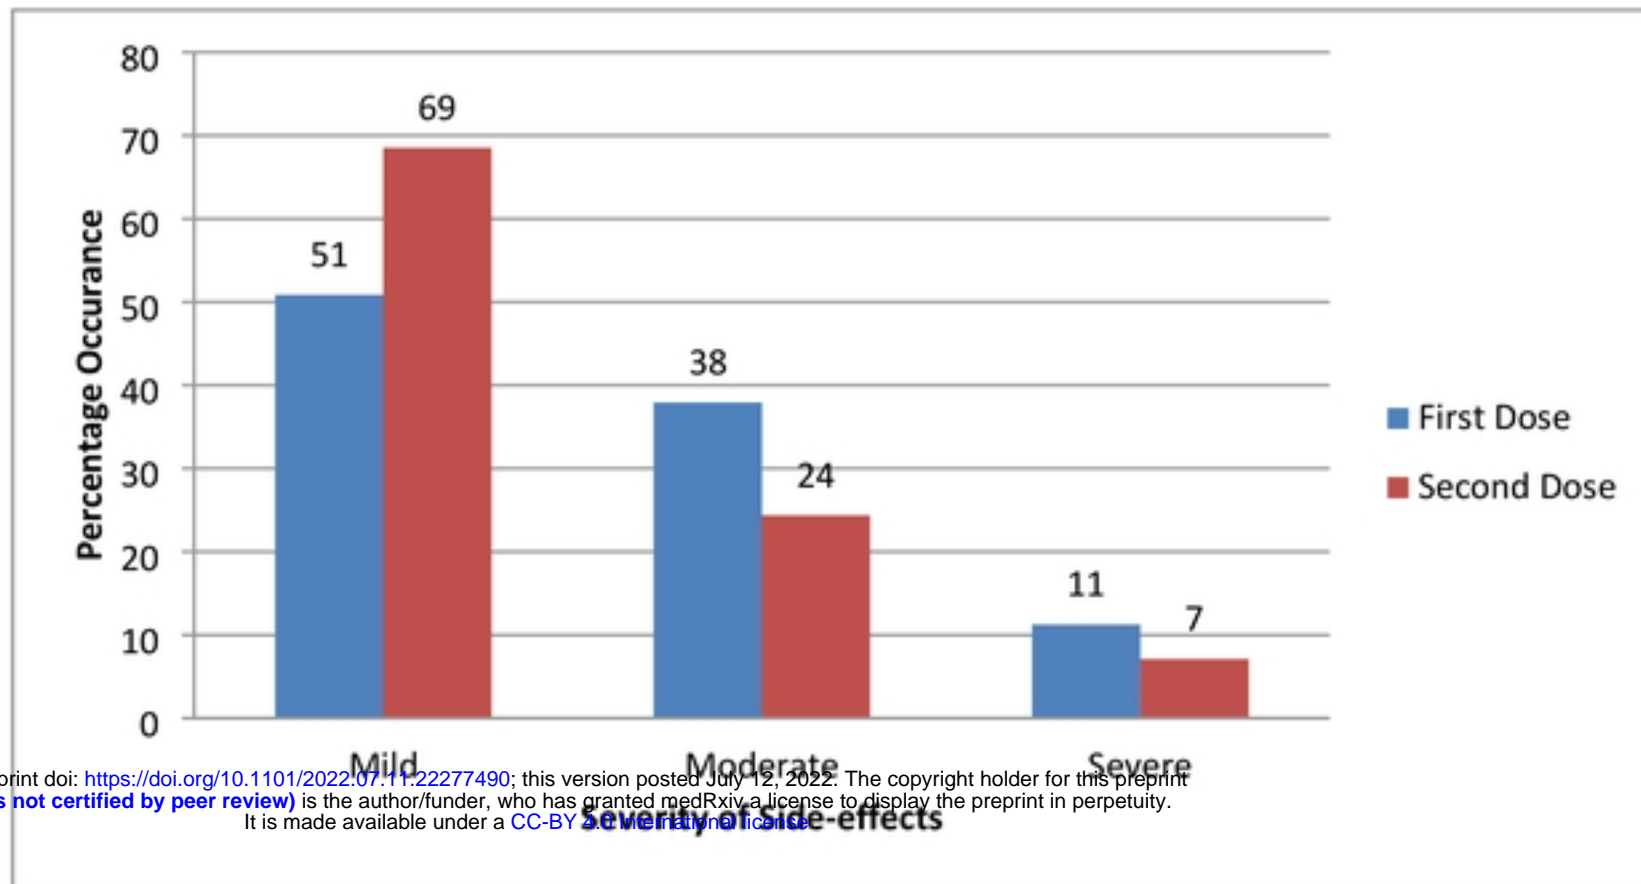

Figure 3: Severity of self-reported side-effects on the different vaccine doses

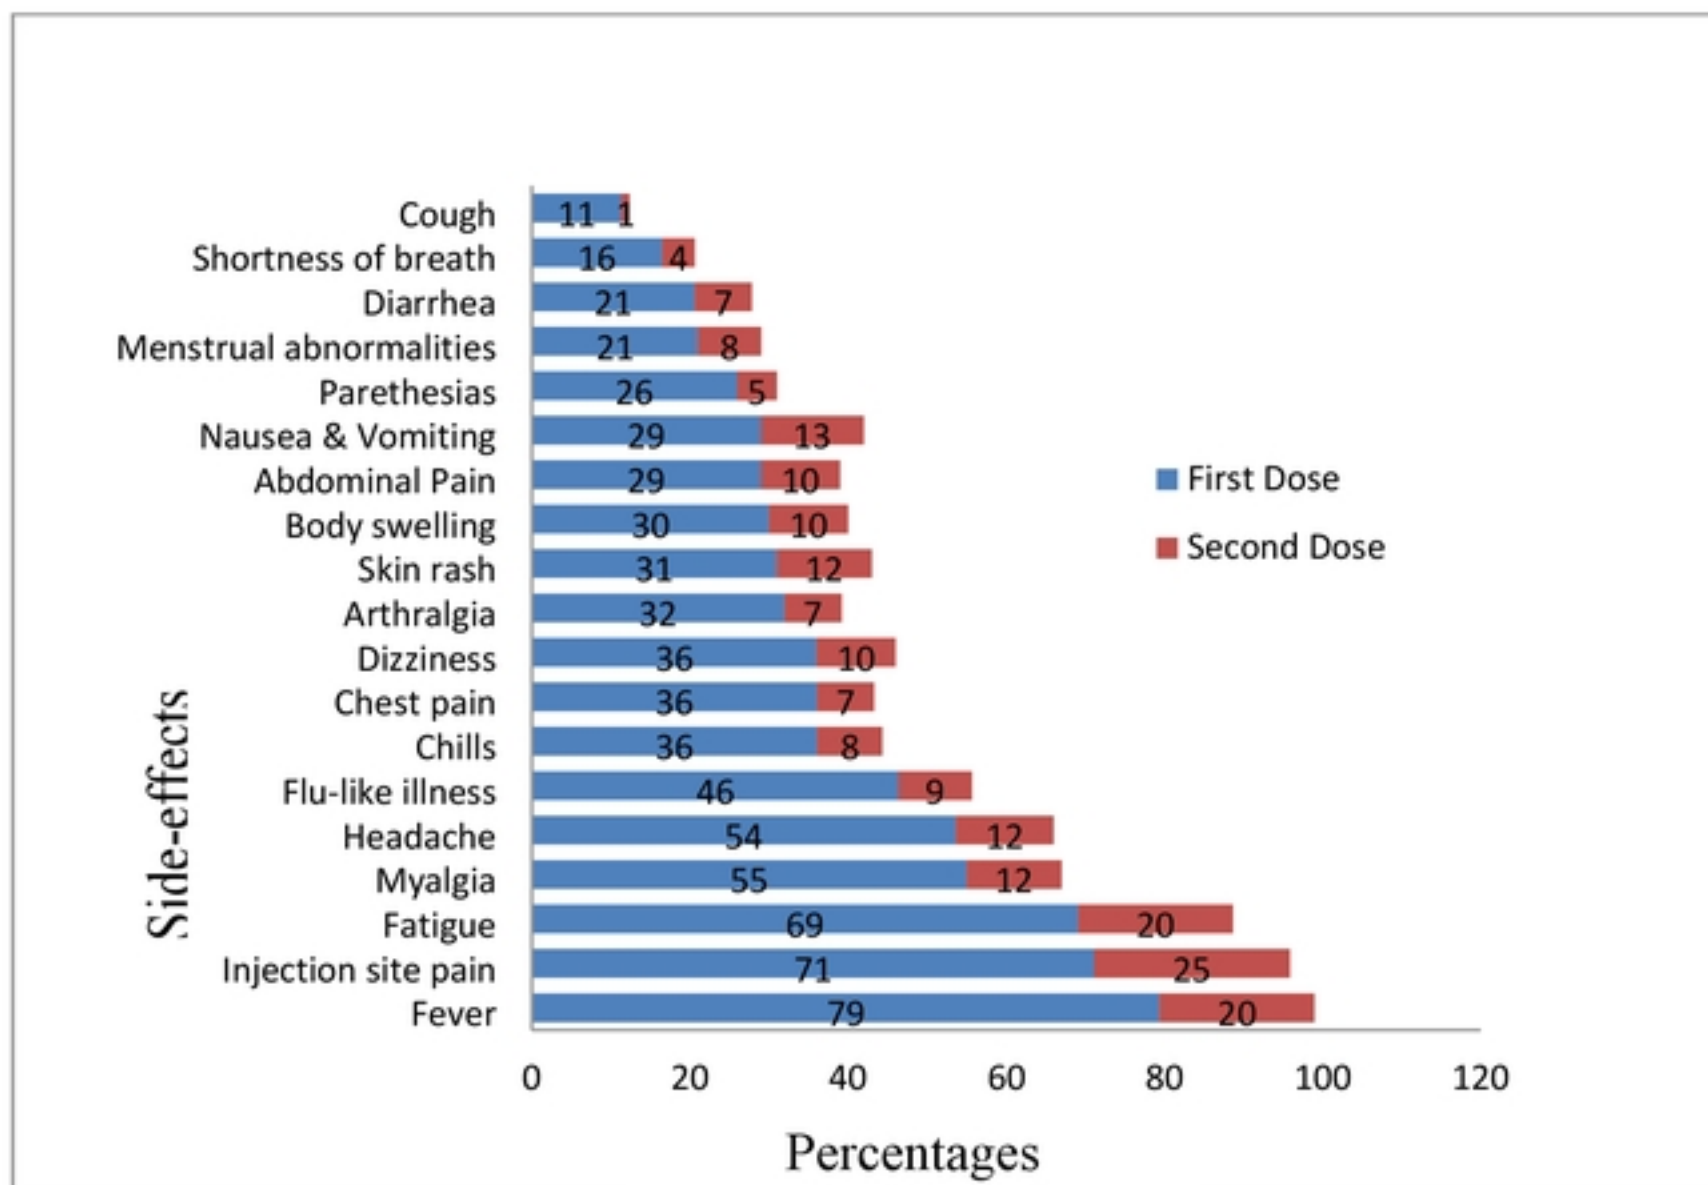

Figure 4: The different self-reported side effects on both COVID-19 vaccine doses

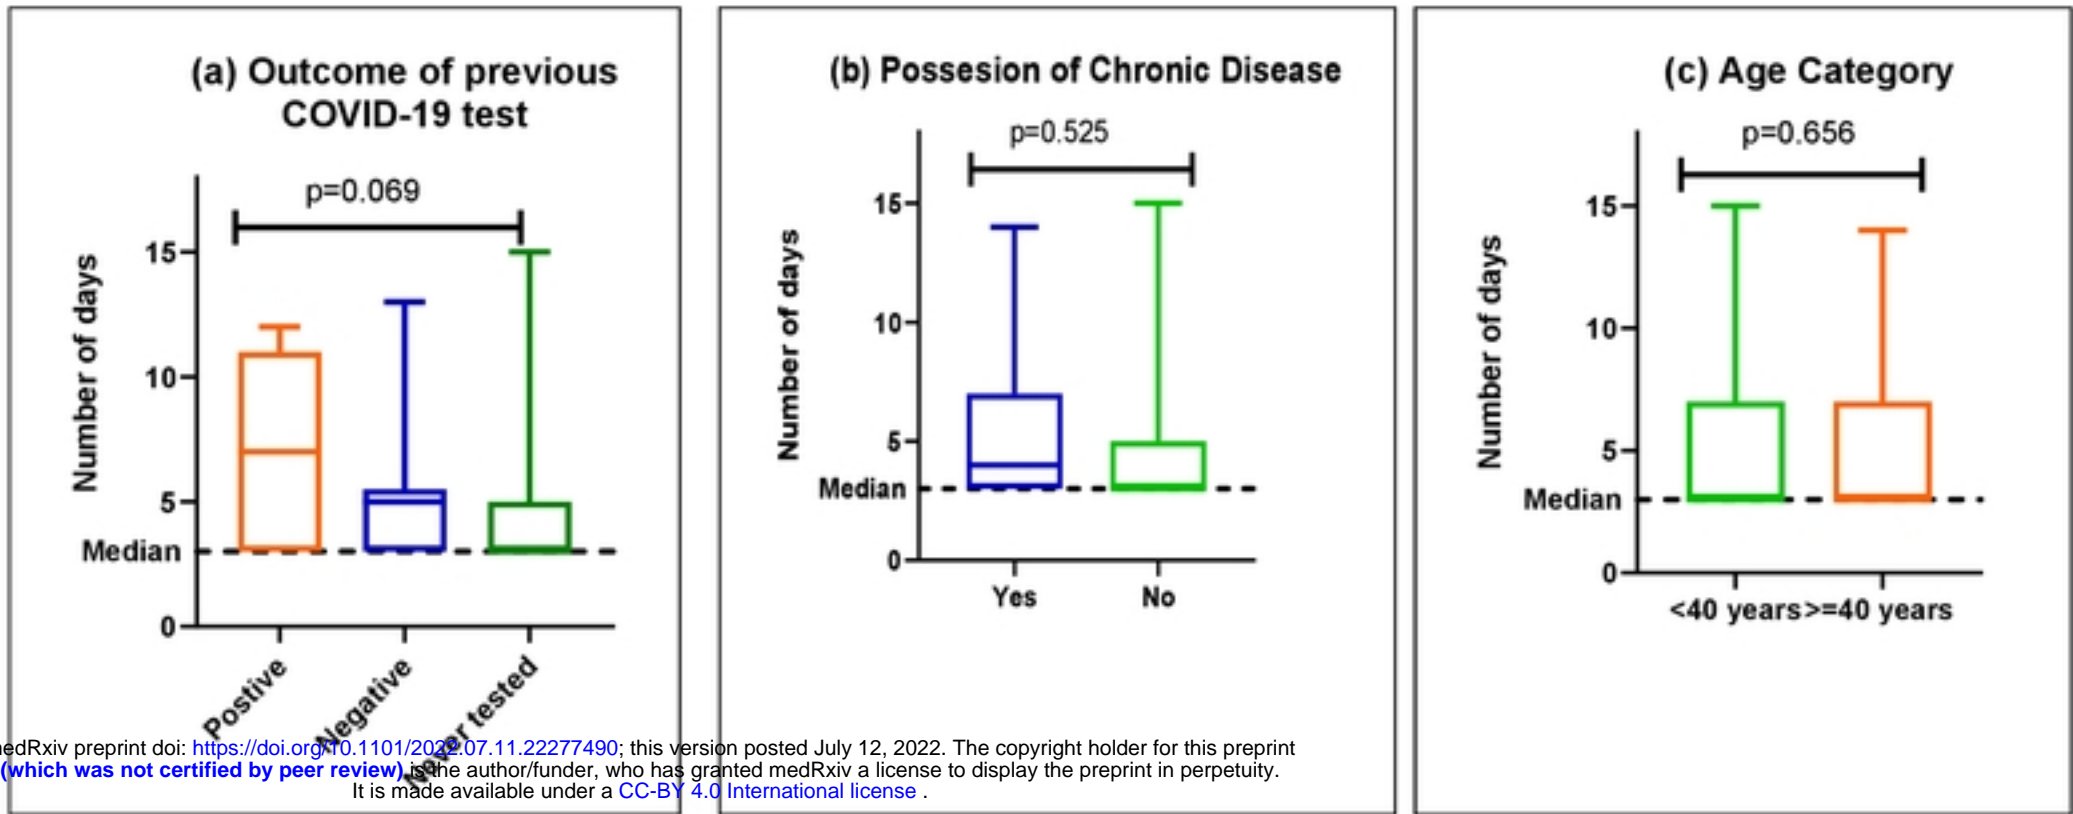

Figure 5: Duration of self-reported side-effects compared among (a) outcomes of previous COVID-19 test (b) possession of chronic illness and (c) age category. Median duration of side-effects is 3 days
